# Supplementary material for: Bayesian Optimization-Assisted Screening to Identify Improved Reaction Conditions for Spiro-Dithiolane Synthesis
Source: MDPI journal article supplement (doi:10.3390/molecules28135180), 2023-07-03

# Bayesian Optimization-assisted Screening to Identify Improved Reaction Conditions for Spiro-dithiolane Synthesis

Masaru Kondo,<sup>1,2</sup> H. D. P. Wathsala,<sup>1</sup> Kazonori Ishikawa,<sup>1</sup> Daisuke Yamashita,<sup>3</sup>, Takeshi Miyazaki,<sup>3</sup> Yoji Ohno,<sup>3</sup> Hiroaki Sasai,<sup>1</sup> Takashi Washio,<sup>1</sup> and Shinobu Takizawa\*<sup>1</sup>

<sup>1</sup>SANKEN, Osaka University, Mihogaoka, Ibaraki-shi, Osaka 567-0047, Japan

<sup>2</sup>Department of Materials Science and Engineering, Graduate School of Science and Engineering, Ibaraki University, Nakanarusawa-cho, Hitachi-shi, Ibaraki 316-8511, Japan

<sup>3</sup>Asahi Chemical Co. Ltd., Yodogawa-ward, Osaka 532-0035, Japan

<sup>4</sup>Graduate School of Pharmaceutical Sciences, Osaka University, Suita-shi, Osaka 565-0871, Japan

E-mail: taki@sanken.osaka-u.ac.jp

## Table of Contents

|   |                                                     |     |
|---|-----------------------------------------------------|-----|
| 1 | Optimization table                                  | S 1 |
| 2 | GC yield calculation                                | S 3 |
| 3 | Calculation of correlation coefficient using pandas | S 6 |

## 1. BO-assisted multiparameter screening of sulfurization

As a result, we can get many advantages from them in order to enhance Asahi's products demand.

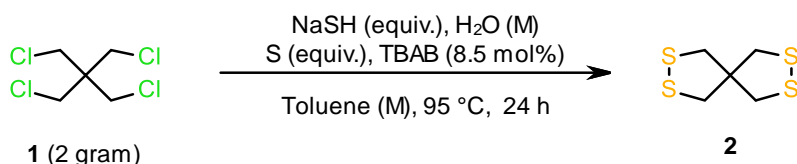

Optimization Table S1: As a result, we can get many advantages from them in order to enhance Asahi's products demand.

| entry | NaSH (eq.) | H <sub>2</sub> O (M) | S (eq.) | Toluene (M) | GC conv.% |
|-------|------------|----------------------|---------|-------------|-----------|
| 1     | 6.0        | 1.38                 | 3.0     | 2.36        | 68        |
| 2     | 6.5        | 1.67                 | 2.4     | 1.42        | 65        |
| 3     | 4.5        | 1.21                 | 2.4     | 3.32        | 51        |
| 4     | 5.5        | 1.98                 | 3.0     | 0.9         | 39        |

|    |     |      |     |      |                 |
|----|-----|------|-----|------|-----------------|
| 5  | 5.5 | 0.99 | 1.2 | 1.42 | 76              |
| 6  | 6.5 | 1.11 | 2.0 | 3.32 | 66              |
| 7  | 4.5 | 1.61 | 1.2 | 0.9  | 52              |
| 8  | 5.8 | 1.02 | 1.4 | 1.46 | 78              |
| 9  | 5.5 | 5.3  | 2.1 | 4.54 | 67              |
| 10 | 2.7 | 7.0  | 3.3 | 2.16 | 31              |
| 11 | 6.9 | 18.4 | 2.7 | 1.42 | 68              |
| 12 | 8.3 | 4.3  | 0.9 | 0.84 | 48              |
| 13 | 4.1 | 10.0 | 1.5 | 1.06 | 66              |
| 14 | 6.7 | 16.2 | 2.7 | 1.5  | 70              |
| 15 | 6.5 | 9.2  | 2.0 | 2.26 | 78              |
| 16 | 7.0 | 29.8 | 1.3 | 4.54 | 89              |
| 17 | 7.0 | 29.8 | 1.3 | 4.54 | 87 <sup>a</sup> |
| 19 | 7.0 | 29.8 | 1.3 | 4.54 | 81 <sup>b</sup> |

Reaction condition: **1**(2gram), NaSH (eq), Sulphur (eq), H<sub>2</sub>O (M), Toluene (M), TBAB (8.5 mol %) at 95 °C for 24 h;  
a) 20g scale; b) 100g scale

*Calculation of Molarity (M):*

H<sub>2</sub>O (M): mmol of **1**/H<sub>2</sub>O volume

Toluene (M): mmol of **1**/Toluene volume

H<sub>2</sub>O Volume: H<sub>2</sub>O weight/density

Toluene volume: Toluene weight/density

H<sub>2</sub>O weight: WR1\*NaSH weight

Toluene weight: WR2\* weight of **1**

## 2. Calculation of GC yield from GC conversion chart: Table 2, entry 03 (100g scale)

a) Pure GC chart of tetrachloropentaerythritol (4Cl): **8:4 min** (1.46 mol/L)

Chromatogram

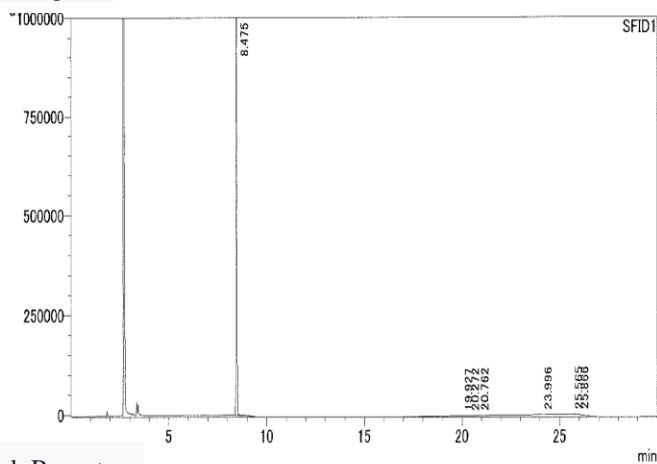

Peak Report

| Peak# | tR<br>(min) | Area    | Hight   | Area%   | Mark | Compound name |
|-------|-------------|---------|---------|---------|------|---------------|
| 1     | 8.475       | 4693741 | 1609896 | 99.691  |      |               |
| 2     | 19.927      | 1321    | 110     | 0.028   |      |               |
| 3     | 20.272      | 1660    | 112     | 0.035   | V    |               |
| 4     | 20.762      | 2303    | 175     | 0.049   | V    |               |
| 5     | 23.996      | 1689    | 311     | 0.036   |      |               |
| 6     | 25.565      | 1678    | 280     | 0.036   | V    |               |
| 7     | 25.866      | 5912    | 394     | 0.126   |      |               |
| 合計    |             | 4708304 | 1611278 | 100.000 |      |               |

b) Pure GC chart of Spiro-dithiolane (4S): **15.8 min** (1.46 mol/L)

Chromatogram

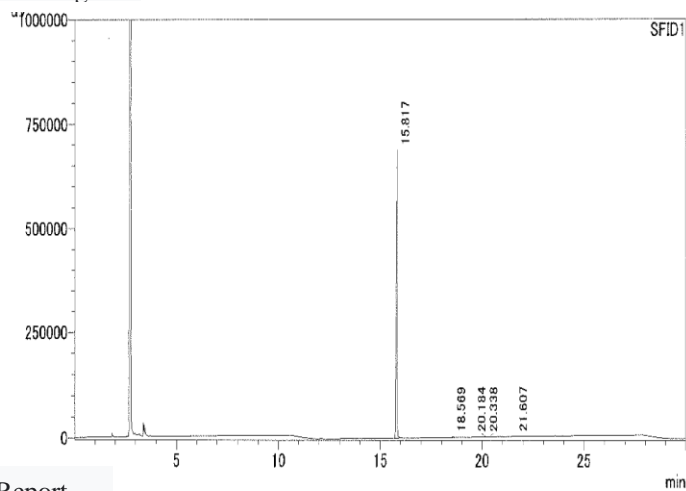

Peak Report

| Peak# | tR<br>(min) | Area    | Hight  | Area%   | Mark | Compound name |
|-------|-------------|---------|--------|---------|------|---------------|
| 1     | 15.817      | 2328234 | 682949 | 99.391  |      |               |
| 2     | 18.569      | 9123    | 1594   | 0.389   |      |               |
| 3     | 20.184      | 2535    | 147    | 0.108   | V    |               |
| 4     | 20.338      | 1571    | 187    | 0.067   | V    |               |
| 5     | 21.607      | 1042    | 109    | 0.044   |      |               |
| 合計    |             | 2342505 | 684987 | 100.000 |      |               |

b) 1:1 ratio of tetrachloropentaerythritol (50%) and Spiro-dithiolane (50%): (1.46 mol/L)

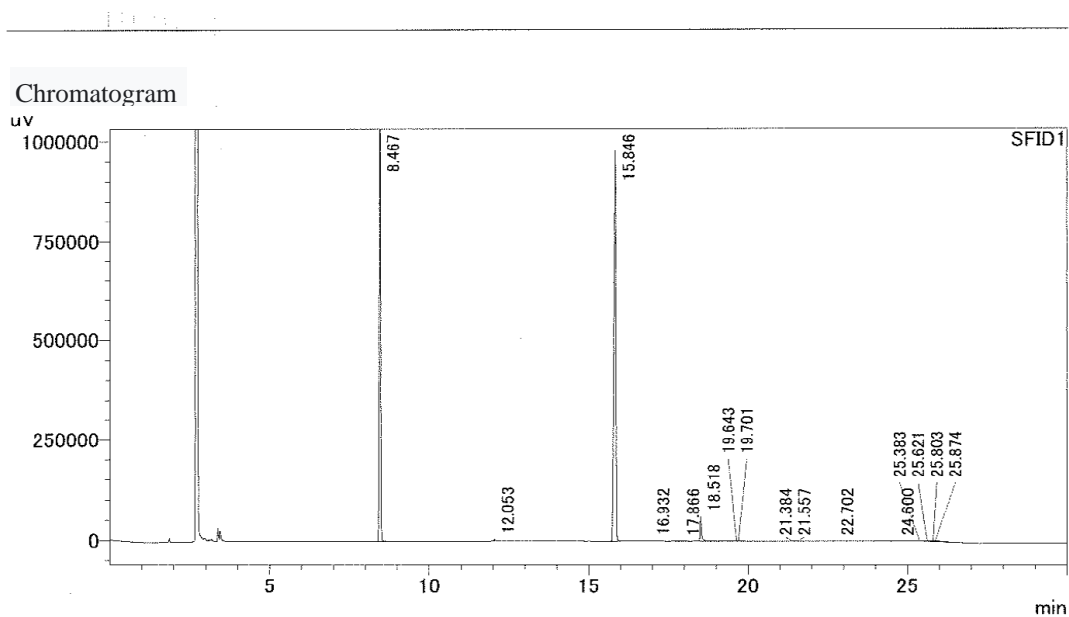

Peak Report

| Peak# | tR (min) | Area    | Hight   | Area%   | Mark | Compound name |
|-------|----------|---------|---------|---------|------|---------------|
| 1     | 8.467    | 3296188 | 1237215 | 42.466  |      |               |
| 2     | 12.053   | 21424   | 4619    | 0.276   |      |               |
| 3     | 15.846   | 4107187 | 974362  | 52.915  | S    |               |
| 4     | 16.932   | 14960   | 938     | 0.193   | V    |               |
| 5     | 17.866   | 4785    | 286     | 0.062   | V    |               |
| 6     | 18.518   | 214134  | 60164   | 2.759   | SV   |               |
| 7     | 19.643   | 1352    | 336     | 0.017   | TV   |               |
| 8     | 19.701   | 4285    | 389     | 0.055   | TV   |               |
| 9     | 21.384   | 4557    | 808     | 0.059   |      |               |
| 10    | 21.557   | 1240    | 221     | 0.016   | V    |               |
| 11    | 22.702   | 1269    | 244     | 0.016   | V    |               |
| 12    | 24.600   | 1173    | 107     | 0.015   |      |               |
| 13    | 25.383   | 3226    | 435     | 0.042   | V    |               |
| 14    | 25.621   | 21606   | 1452    | 0.278   | V    |               |
| 15    | 25.803   | 10260   | 1884    | 0.132   | V    |               |
| 16    | 25.874   | 54273   | 2139    | 0.699   | V    |               |
| 合計    |          | 7761918 | 2285598 | 100.000 |      |               |

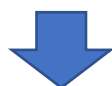

d) Draw a graph GC area vs GC yield) Graph of GC area vs GC yield

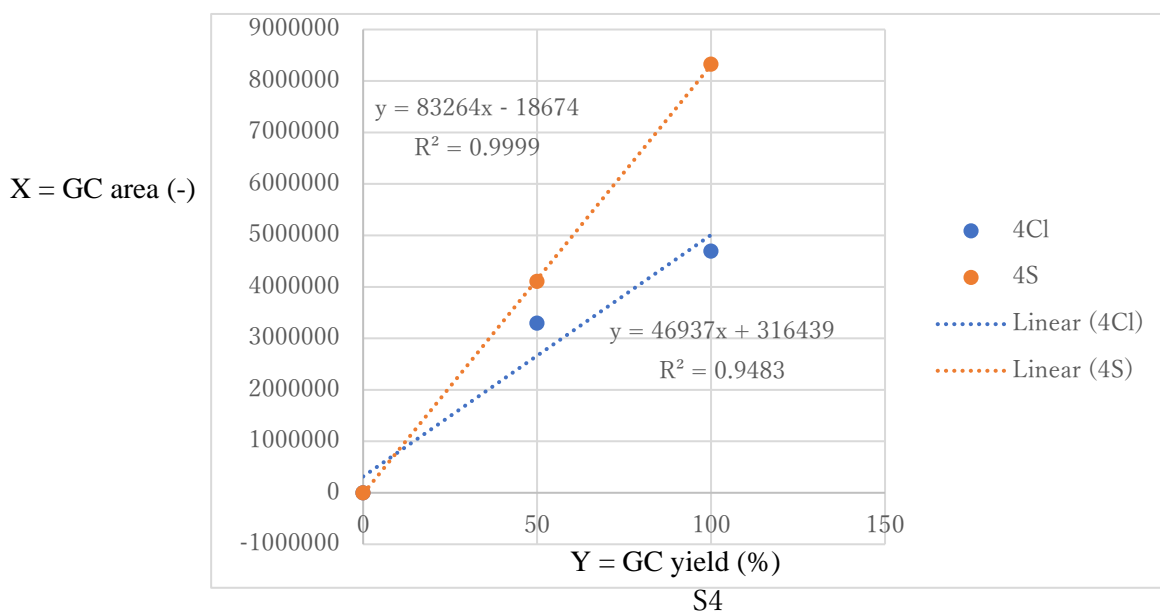

e) 100g scale GC chart (Table 2, entry 3): (1.46 mol/L)

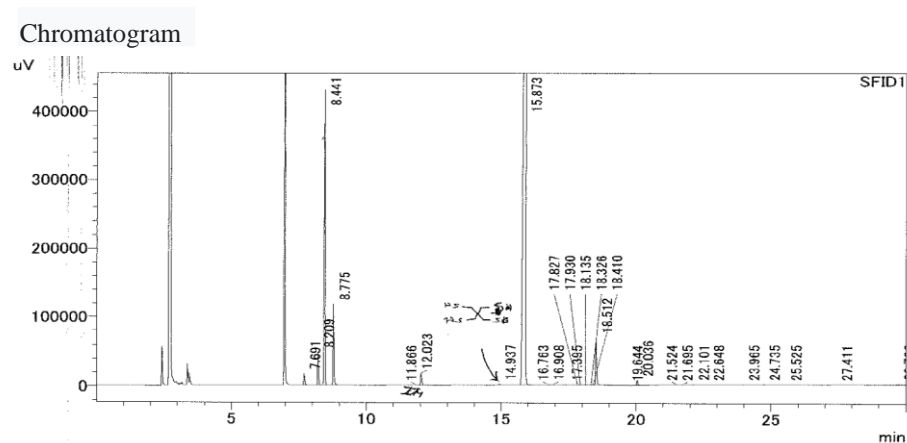

Peak Report

| Peak# | IR (min) | Area    | Height  | Area%  | Mark | Compound name |
|-------|----------|---------|---------|--------|------|---------------|
| 1     | 7.691    | 48635   | 16815   | 0.567  | M    |               |
| 2     | 8.209    | 118017  | 47676   | 1.376  |      |               |
| 3     | 8.441    | 992121  | 426902  | 11.570 | V    |               |
| 4     | 8.775    | 279507  | 116476  | 3.260  |      |               |
| 5     | 11.866   | 3422    | 674     | 0.040  |      |               |
| 6     | 12.023   | 57992   | 17445   | 0.676  | V    |               |
| 7     | 14.937   | 11490   | 1822    | 0.134  |      |               |
| 8     | 15.873   | 6758659 | 1310948 | 78.817 | S    |               |
| 9     | 16.763   | 1734    | 276     | 0.020  | TV   |               |
| 10    | 16.908   | 6155    | 619     | 0.072  | TV   |               |
| 11    | 17.395   | 1080    | 278     | 0.013  |      |               |
| 12    | 17.827   | 1623    | 233     | 0.019  | V    |               |
| 13    | 17.930   | 3189    | 325     | 0.037  | V    |               |
| 14    | 18.135   | 5747    | 470     | 0.067  | V    |               |
| 15    | 18.326   | 4410    | 649     | 0.051  | V    |               |
| 16    | 18.410   | 2894    | 747     | 0.034  | V    |               |
| 17    | 18.512   | 208957  | 68043   | 2.437  | V    |               |
| 18    | 19.644   | 2883    | 818     | 0.034  |      |               |
| 19    | 20.036   | 25712   | 7748    | 0.300  |      |               |
| 20    | 21.524   | 1416    | 396     | 0.017  | V    |               |
| 21    | 21.695   | 1199    | 289     | 0.014  |      |               |
| 22    | 22.101   | 4088    | 951     | 0.048  |      |               |

Area of 6758659 = GC yield??

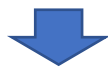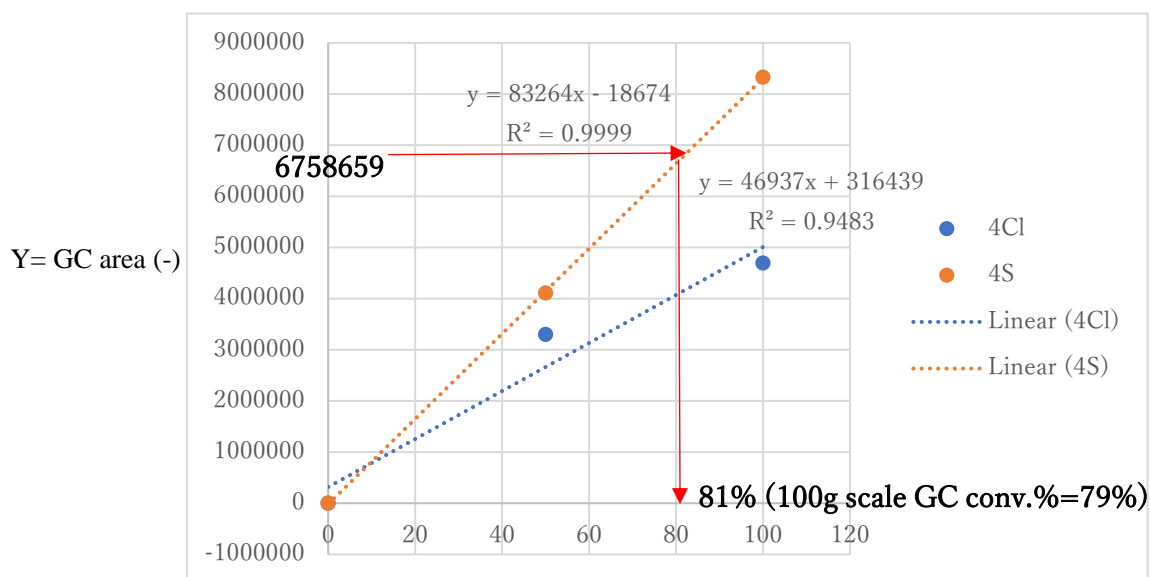

Calculation [1]:

$$Y = 83264X - 18674$$

$$6758659 + 18674/83264 = X$$

$$X = 81\%$$

**GC conversion yield  $\approx$  GC calculated yield  $\pm 2$**

Reference

1. <https://www.shimadzu.com/an/service-support/technical-support/analysis-basics/fundamentals/results.html>

**3. Calculation of the correlation coefficient between the conversion yield of 1 and each loading of chemicals afforded the corresponding values.**

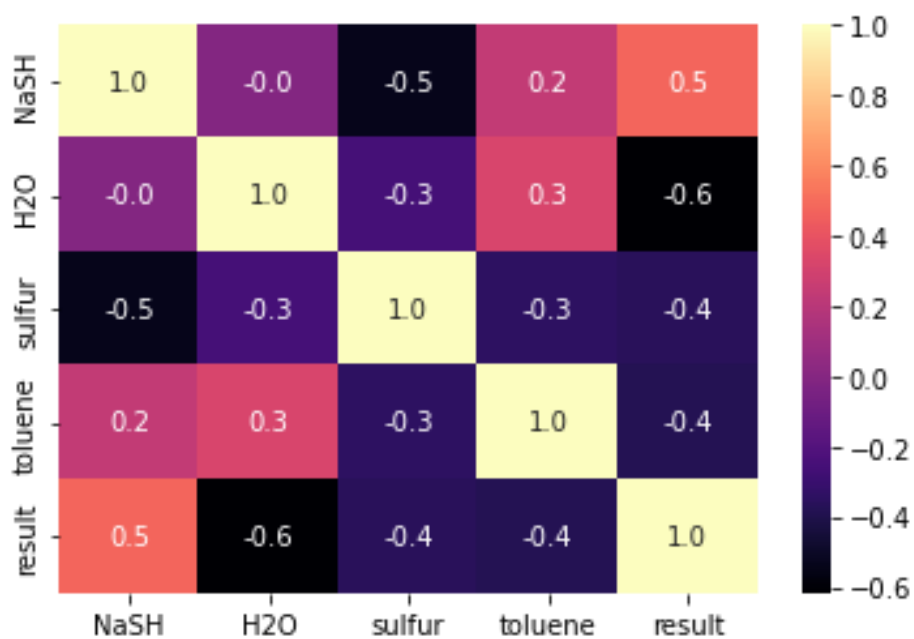

Supplement: s1 [file s1]
